# Supplementary material for: Analysis of Variation Between Diagnosis at Admission vs Discharge and Clinical Outcomes Among Adults With Possible Bacteremia
Source: PubMed Central journal article supplement (PMC9226997; doi:10.1001/jamanetworkopen.2022.18172), 2022-06-23
Supplement: jamanetwopen-e2218172-s001.pdf [file jamanetwopen-e2218172-s001.pdf]

## Supplementary Online Content

Dregmans E, Kaal AG, Meziyerh S, et al. Analysis of variation between diagnosis at admission vs discharge and clinical outcomes among adults with possible bacteremia. *JAMA Netw Open*. 2022;5(6):e2218172. doi:10.1001/jamanetworkopen.2022.18172

**eTable.** Final Determinants of Misdiagnosis

**eFigure.** Flow Diagram of Patients

This supplementary material has been provided by the authors to give readers additional information about their work.

| <b>eTable. Final Determinants of Misdiagnosis<sup>abc</sup></b> |           |
|-----------------------------------------------------------------|-----------|
| Candidate predictors                                            | B (Lasso) |
| Age (per decade)                                                | 0.110     |
| Dementia                                                        | 0.359     |
| Positive urine sediment with no Loeb criteria <sup>de</sup>     | 0.139     |
| Site of infection at ED                                         |           |
| Abdominal                                                       | 0.333     |
| Bone and Joint                                                  | 1.217     |
| CNS                                                             | 1.628     |
| Intravascular                                                   | 1.896     |
| Respiratory                                                     | reference |
| Skin and Soft tissue                                            | 0         |
| Urogenital                                                      | 0.156     |

<sup>a</sup> Abbreviations: B regression coefficients, CNS central nervous system, ED emergency department, Lasso Least Absolute Shrinkage and Selection Operator.

<sup>b</sup> One-standard error rule was applied to the optimal lambda value, c-statistic (0.70).

<sup>c</sup> The predicted probability of a misdiagnosis was determined by  $P = 1/[1 + \exp(-(-3.04 + 0.01 \times \text{age (year)} + 0.36 \times \text{dementia} + 0.14 \times \text{positive urine sediment with no Loeb criteria} + 0.33 \times \text{abdominal focus} + 1.22 \times \text{bone/joint focus} + 1.63 \times \text{CNS focus} + 1.90 \times \text{intravascular focus} + 0.16 \times \text{urogenital focus}))]$ .

Instruction: If a predictor is scored positively, the given weight needs to be filled in.

<sup>d</sup> Loeb criteria means dysuria, suprapubic pain/tenderness, frequency or urgency. Positive urine sediment indicates nitrite positive or >5 white blood cells per high-power field.

<sup>e</sup> Occurred in 22.1% (36/163) of the misdiagnosed patients and 14.4% (183/1267) in the correctly diagnosed patients.

**eFigure.** Flow Diagram of Patients

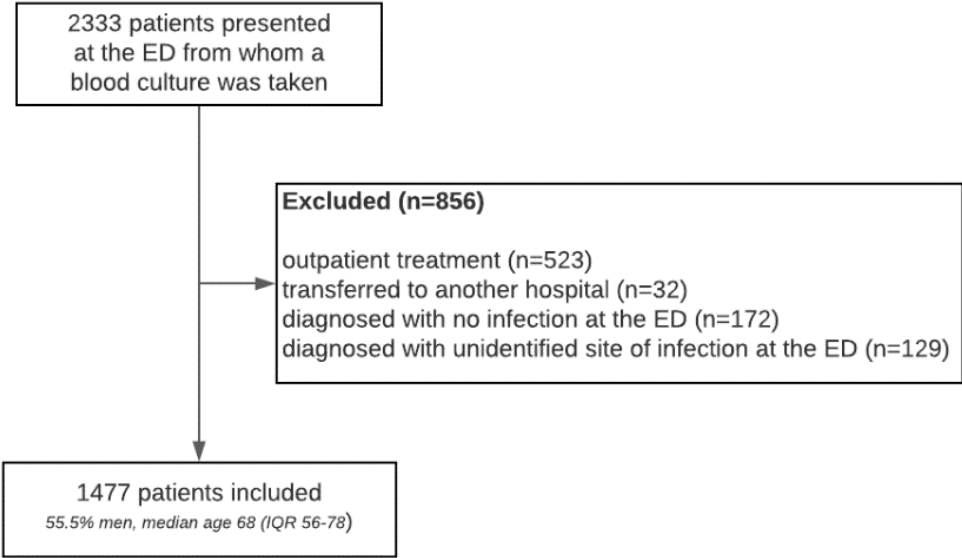

Flow diagram of inclusion.
